# Supplementary material
Source: HighWire-hosted journal article supplement (https://bmjopen.bmj.com/content/11/1/e039470)
Supplement: inline-supplementary-material-1 [file inline-supplementary-material-1.pdf]

Verbatim translation of the scenario and description of the terms

\* It is well known that about one-third of the population of South Korea will develop cancer during their lifetime. This questionnaire is conducted under the assumption that "if you have cancer (especially stage 4)".

\* "Terminal state" is defined as a condition in which treatments for the purpose of life extension are not applicable to patients.

\* "Life-sustaining treatment" is any treatment that serves to prolong life without reversing the underlying medical conditions, and includes cardiopulmonary resuscitation, mechanical ventilation, hemodialysis, and left ventricular assist devices. With the recent passage of relevant legislation, it is becoming an issue to decide whether to receive life-sustaining treatment in advance.
